# Supplementary material for: Myosin 1F Regulates M1-Polarization by Stimulating Intercellular Adhesion in Macrophages
Source: PubMed Central journal article supplement (PMC6335276; doi:10.3389/fimmu.2018.03118), 2019-01-10
Supplement: Data_Sheet_1.pdf [file Data_Sheet_1.pdf]

# Supplementary figures 1

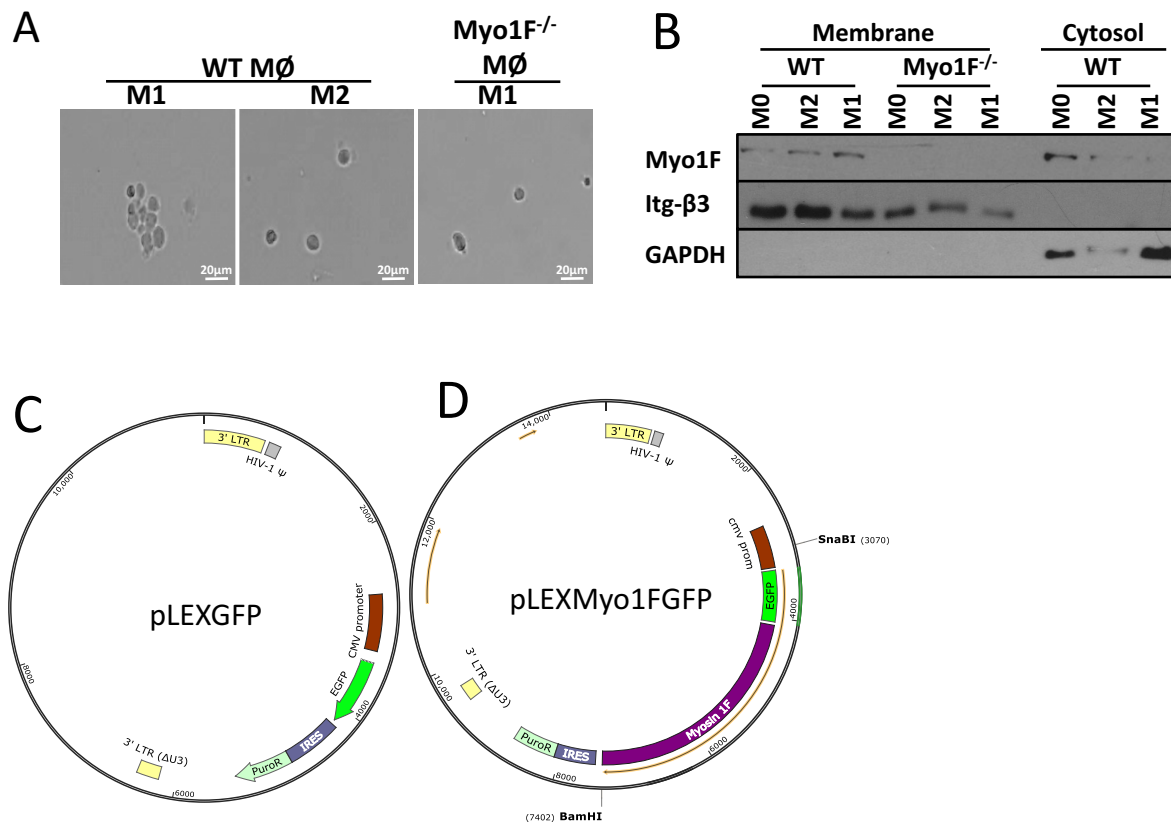

**Figure S1. Lentiviral vector design.**

- A) Bright field images of BMM induced to M1 or M2 phenotype in a suspension assay. Bar= 20µm. n=5.
- B) Membrane bound Myo1F was evaluated in BMM differentiated to M0, M1 and M2. Cytosolic and membrane fractions were prepared as previously reported (87). Integrin β3 marks membrane fraction and GAPDH = Cytosolic fraction.
- C) Lentiviral vector pLEX expressing GFP reporter.
- D) Lentiviral vector pLEX expressing myosin 1F protein fused to GFP in amine C-terminal end. Restriction enzymes SnaBI and BamHI were used to clone Myo1F to pLEX vector as describe in materials and methods.

## Supplementary figure 2

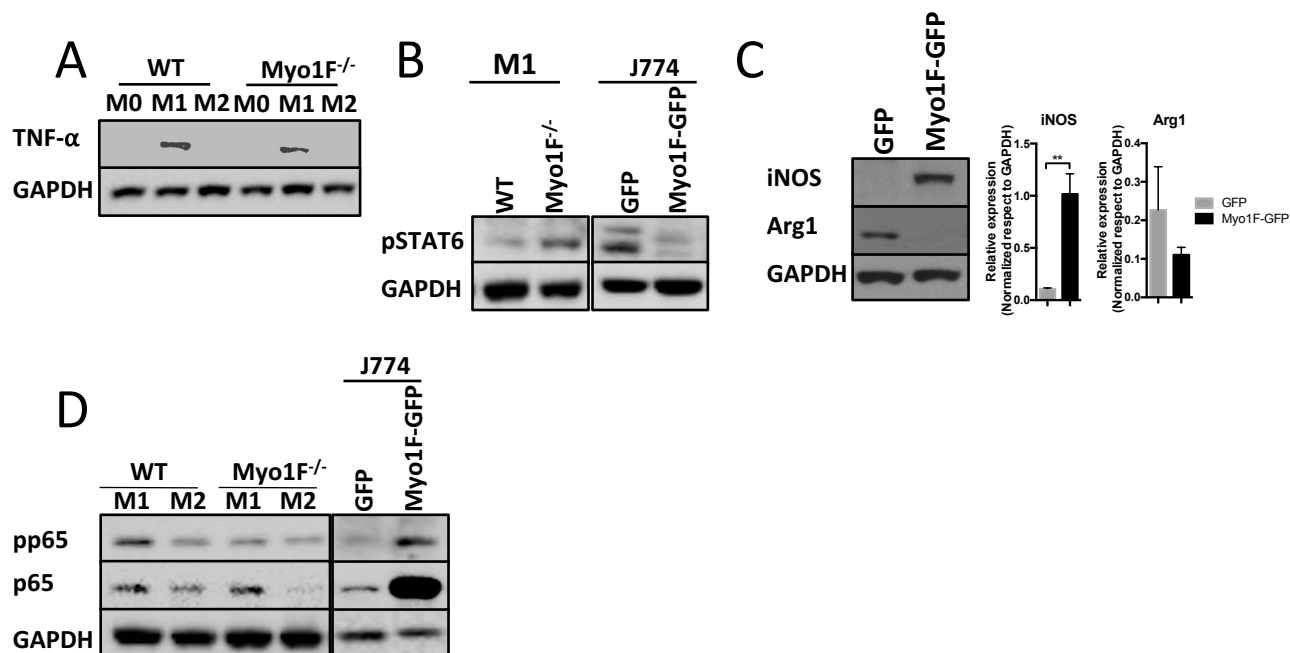

**Figure S2. M1 phenotype is regulated by Myo1F.**

- A) Representative western blot for TNF $\alpha$  in cell lysates of M0, M1 and M2 BMM of WT and Myo1F<sup>-/-</sup> origin. GAPDH was used as loading control. n=3.
- B) Representative western blot for pSTAT6 in cell lysates of M1 BMM of WT and Myo1F<sup>-/-</sup> origin and J774 transduced with GFP or Myo1F-GFP. GAPDH was used as loading control. n=3.
- C) Representative western blot for iNOS and Arginase 1 (Arg1) in cell lysates of J774 transduced with GFP or Myo1F-GFP. Quantification is displayed in the graph. \*\* $p=0.01$  GAPDH was used as loading control. n=6.
- D) Representative western blot for pp65 and p65 in cell lysates of macrophages. BMM of WT and Myo1F<sup>-/-</sup> origin were differentiated into M1 and M2 phenotype. J774 stably transduced with GFP or Myo1F-GFP. GAPDH was used as loading control. n=3.

# Supplementary figure 3

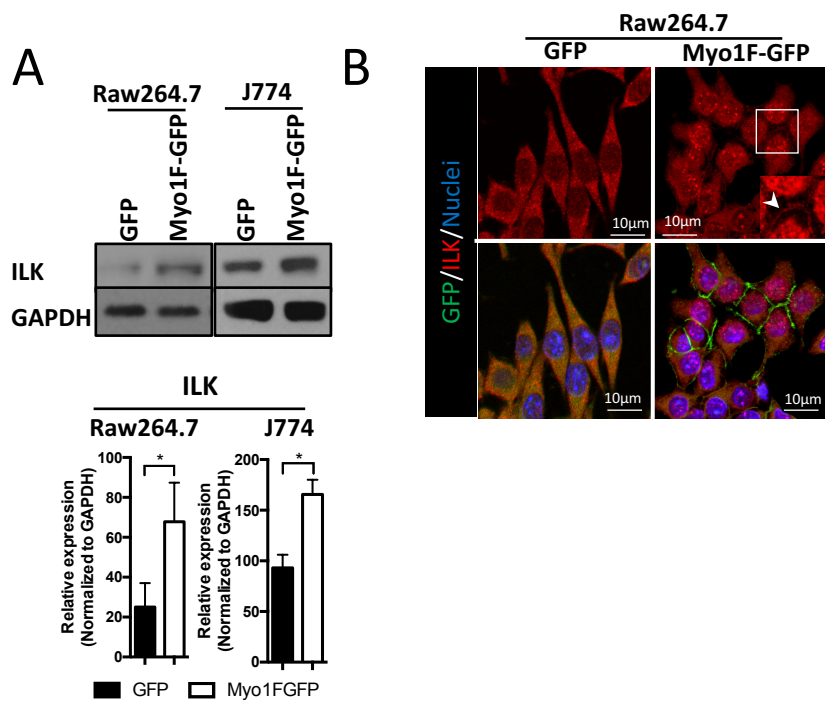

**Figure S3. Myo1F positively regulates ILK and p65 signaling.**

- A) Representative western blot for ILK in cell lysates of RAW264.7 and J774 transduced with GFP or Myo1F-GFP. GAPDH was used as loading control.  $n=3$ . Graphs corresponding to densitometric analysis are shown. Mean derived from three independent experiments.  $*p=0.05$ .
- B) Immunofluorescence staining of ILK in RAW264.7 cells transduced with GFP or Myo1F-GFP virus. Inset depicts a cropped area marked with white square. White arrow = membrane bound ILK. GFP=Green. ILK=Red. Nuclei=Blue.  $n=5$ . Bar=10 $\mu$ m.

# Supplementary figure 4

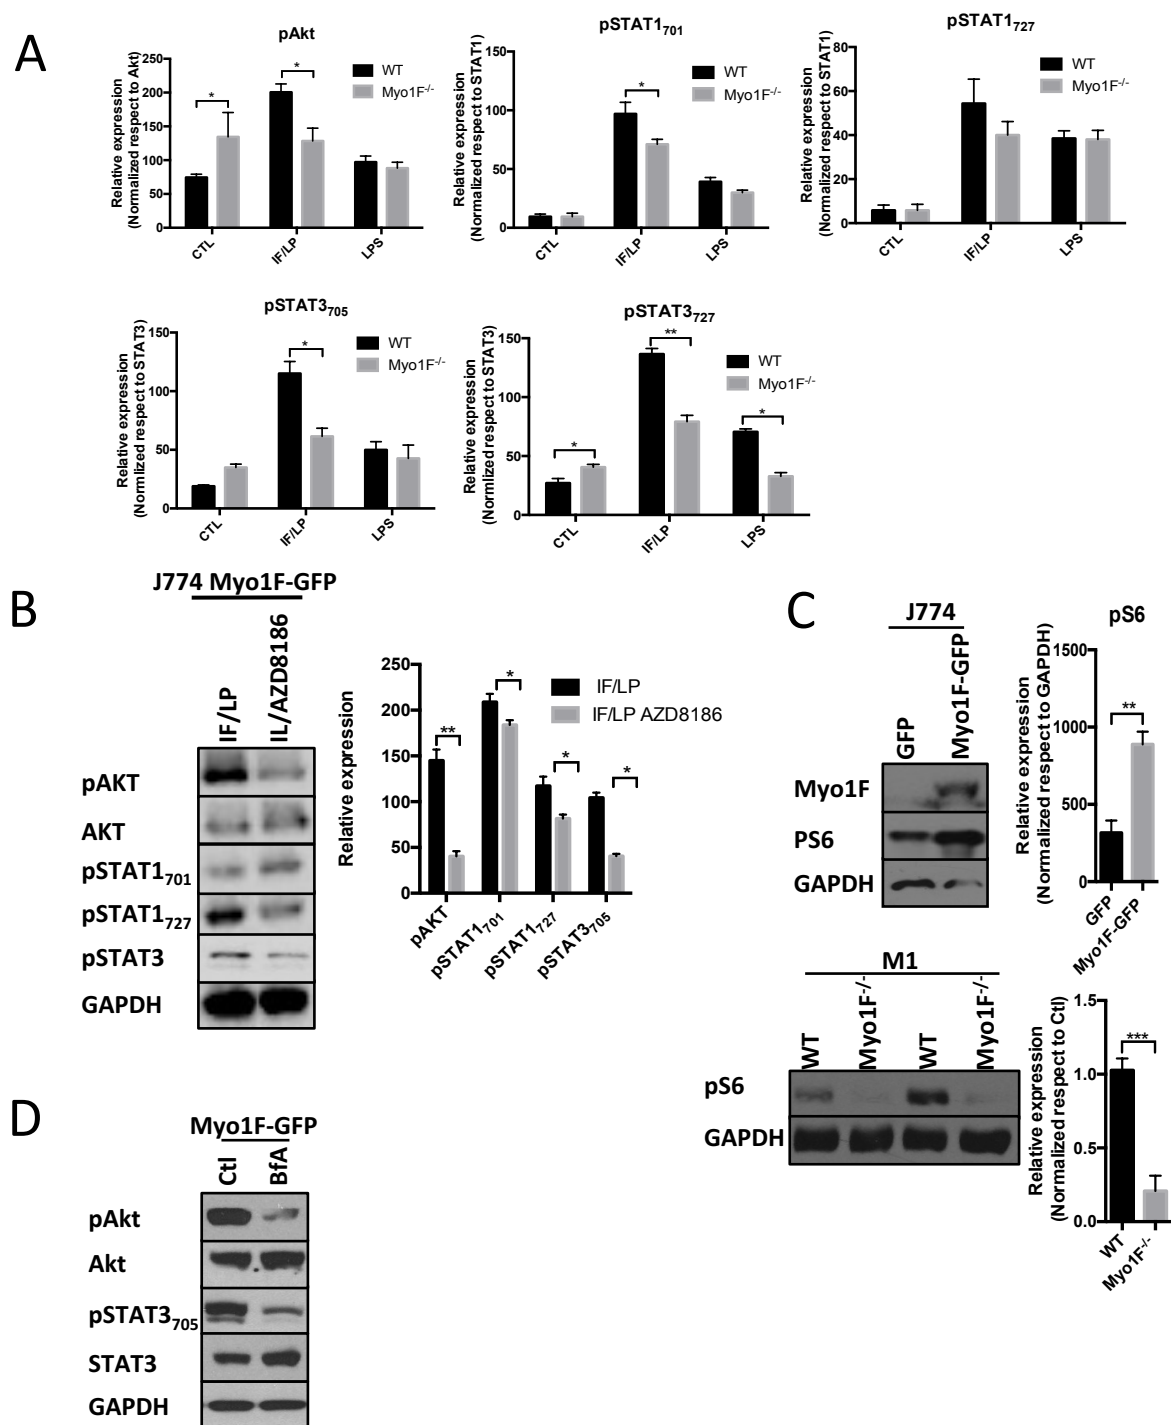

**Figure S4. Inhibition of  $\beta 3$ /PI3K/Akt/mTOR signaling prevents the increase in the activation of pSTAT1 and pSTAT3 but not STAT6 signaling.**

- A) Densitometric analysis were carried out after Western blotting pAkt473, pSTAT701, pSTAT727, pSTAT3705 and pSTAT3727 in cell lysates of WT or Myo1F<sup>-/-</sup> after LPS (1  $\mu$ g/ml) or LPS (1  $\mu$ g/ml) plus IFN- $\gamma$  (20ng/ml) stimulation for 5h. Phosphoproteins were normalized against total protein. Mean derived from three independent experiments is graph. \* $p=0.05$ , \*\* $p=0.01$ .
- B) Representative western blot for, pAkt, Akt, pSTAT<sub>701</sub>, pSTAT<sub>727</sub>, STAT1, pSTAT3 and STAT3 in cell lysates of J774 cells overexpressing Myo1F after IFN- $\gamma$  (20ng/ml) priming for 1h plus 5h stimulation with LPS (1  $\mu$ g/ml) (IF/LP) or in presence of PI3K inhibitor (AZD8186). AZD8186 was administered 30 min before IF/LP stimulation. Densitometric analyses obtained from those results are shown as graphs. \* $p=0.05$ , \*\* $p=0.01$ .
- C) The mTORC1 marker, pS6, was analyzed in cell lysates of macrophages. Non-stimulated J774 overexpressing Myo1F or GFP were lysed in Ripa buffer. BMM of WT or Myo1F<sup>-/-</sup> were polarized to M1-phenotype with IFN/LPS for 24h. GAPDH was used as loading control. Densitometric analysis was carried out.  $n=3$ . \*\* $p=0.01$ , \*\*\* $p=0.0001$ .
- D) pAkt473 and pSTAT3705 was analyzed by western blot in cell lysates of J774-Myo1F-GFP treated with Brefeldin A (BfA). BfA (10  $\mu$ g/ml) treatment was carried out for 5h.  $n=3$ .



## Supplementary figure 5

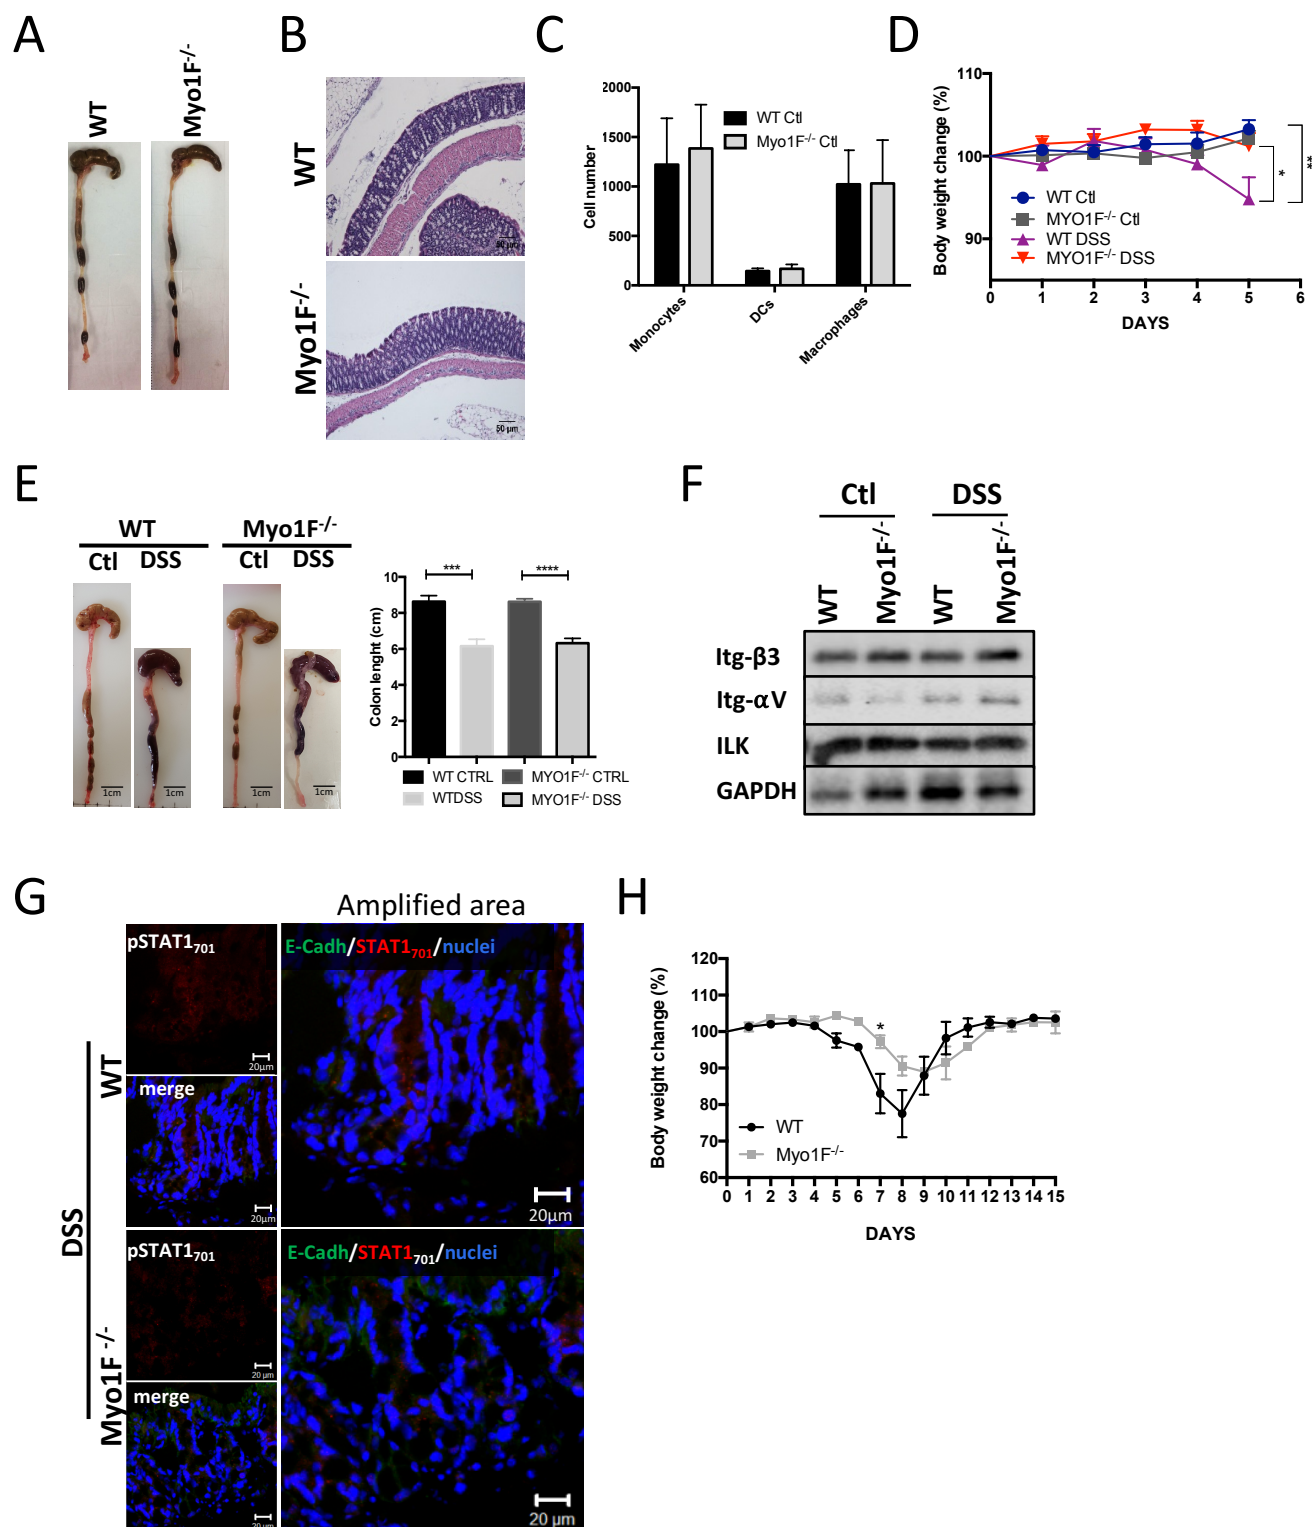

**Figure S5. Myo1F regulates intestinal homeostasis.**

- A) Representative images depicting colon length of WT and Myo1F deficient mice in control conditions.
- B) Hematoxylin & eosin staining of colonic sections obtained from WT and Myo1F deficient mice in control conditions.
- C) Quantification of monocytes, macrophages and dendritic cells isolated from colon of WT and Myo1F<sup>-/-</sup> mice under control conditions. Purification and quantification was performed by Flow cytometry.
- D) Percentage change in body weight in WT and Myo1F deficient mice induced to colitis.
- E) Representative images depicting colon length and graphs showing quantification in WT and Myo1F deficient mice induced to colitis. DSS (2.5%) was dissolved in tap water and administered during 5 days. Control animals received water alone. All the results are derived from independent experiments carry out by duplicate. n=3 mice per group. \* $p=0.05$ , \*\* $p=0.01$ , \*\*\* $p=0.0005$ , \*\*\*\* $p<0.0001$ . Scale bars: 1cm.
- F) Western blot for integrin- $\alpha$ v, integrin- $\beta$ 3 and ILK was performed in cell lysates of colonic tissue obtained from WT and Myo1F deficient mice induced to colitis for 5 days. GAPDH was used as control loading.
- G) Immunofluorescence staining for E-cadh (green) and pSTAT1, (red) in colonic epithelium from WT and Myo1F deficient mice after 5 days of treatment with DSS. Nuclei were stained with Dapi (blue). Magnification is shown. Bar=20  $\mu$ m.
- H) Percentage change in body weight in WT and Myo1F deficient mice in a recuperation assay after colitis induction. \* $p=0.05$ .
